# Supplementary material
Source: PubMed Central journal article supplement (PMC3421639)
Supplement: JVI.00457-12_zjv999096253so1.pdf [file JVI.00457-12_zjv999096253so1.pdf]

**Suppl. Table 1.** Statistics of final simulated annealing structures of the sp-E1 synthetic peptide.

---

|                                                          |                       |                 |
|----------------------------------------------------------|-----------------------|-----------------|
| <i>A. Constraints used</i>                               |                       |                 |
| Distance restraints                                      |                       |                 |
| Intra-residue                                            |                       | 0               |
| Sequential                                               |                       | 86              |
| Medium range                                             |                       | 53              |
| Total distance restraints                                |                       | 139             |
| Dihedral angle constraints                               |                       |                 |
| Phi angles                                               |                       | 21              |
| Psi angles                                               |                       | 20              |
| <br><i>B. Statistics for the final X-PLOR structures</i> |                       |                 |
| Number of structures in the final set                    |                       | 27              |
| X-PLOR energy (kcal.mol <sup>-1</sup> )                  |                       | -70.0 ± 8.4     |
| NOE violations                                           |                       |                 |
| Number > 0.5 Å                                           |                       | none            |
| R.m.s. deviation (Å)                                     |                       | 0.116 ± 0.005   |
| Dihedral angle violations                                |                       |                 |
| Number > 5°                                              |                       | none            |
| R.m.s. deviation (deg)                                   |                       | 0.36 ± 0.30     |
| Deviation from idealized covalent geometry               |                       |                 |
| Angles (deg.)                                            |                       | 0.80 ± 0.03     |
| Improper (deg.)                                          |                       | 0.281 ± 0.014   |
| Bonds (Å)                                                |                       | 0.0050 ± 0.0001 |
| R.m.s. deviation (Å)                                     |                       |                 |
| Backbone (C', C $\alpha$ , N)                            | helix segment 175-185 | 0.24 ± 0.08     |
|                                                          | all residues          | 2.89 ± 1.01     |
| All heavy atoms                                          | helix segment 175-185 | 1.17 ± 0.22     |
|                                                          | all residues          | 3.92 ± 0.93     |
| Ramachandran data <sup>a</sup> (on 569 residues)         |                       |                 |
| Residues in most favoured regions (%)                    |                       | 95.8            |
| Residues in allowed regions (%)                          |                       | 4.2             |
| Residues in generously allowed regions (%)               |                       | 0               |
| Residues in disallowed regions (%)                       |                       | 0               |

---

<sup>a</sup>From PROCHECK (Laskowski *et al* 1993 J Appl Cryst 26, 285-291).
